# Supplementary material
Source: PubMed Central journal article supplement (PMC5096949)

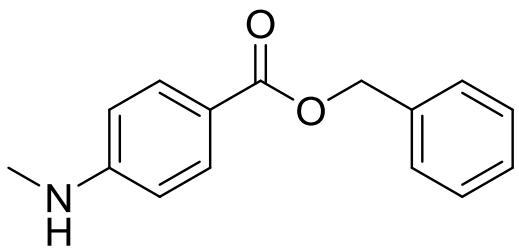

benzyl 4-(methylamino)benzoate

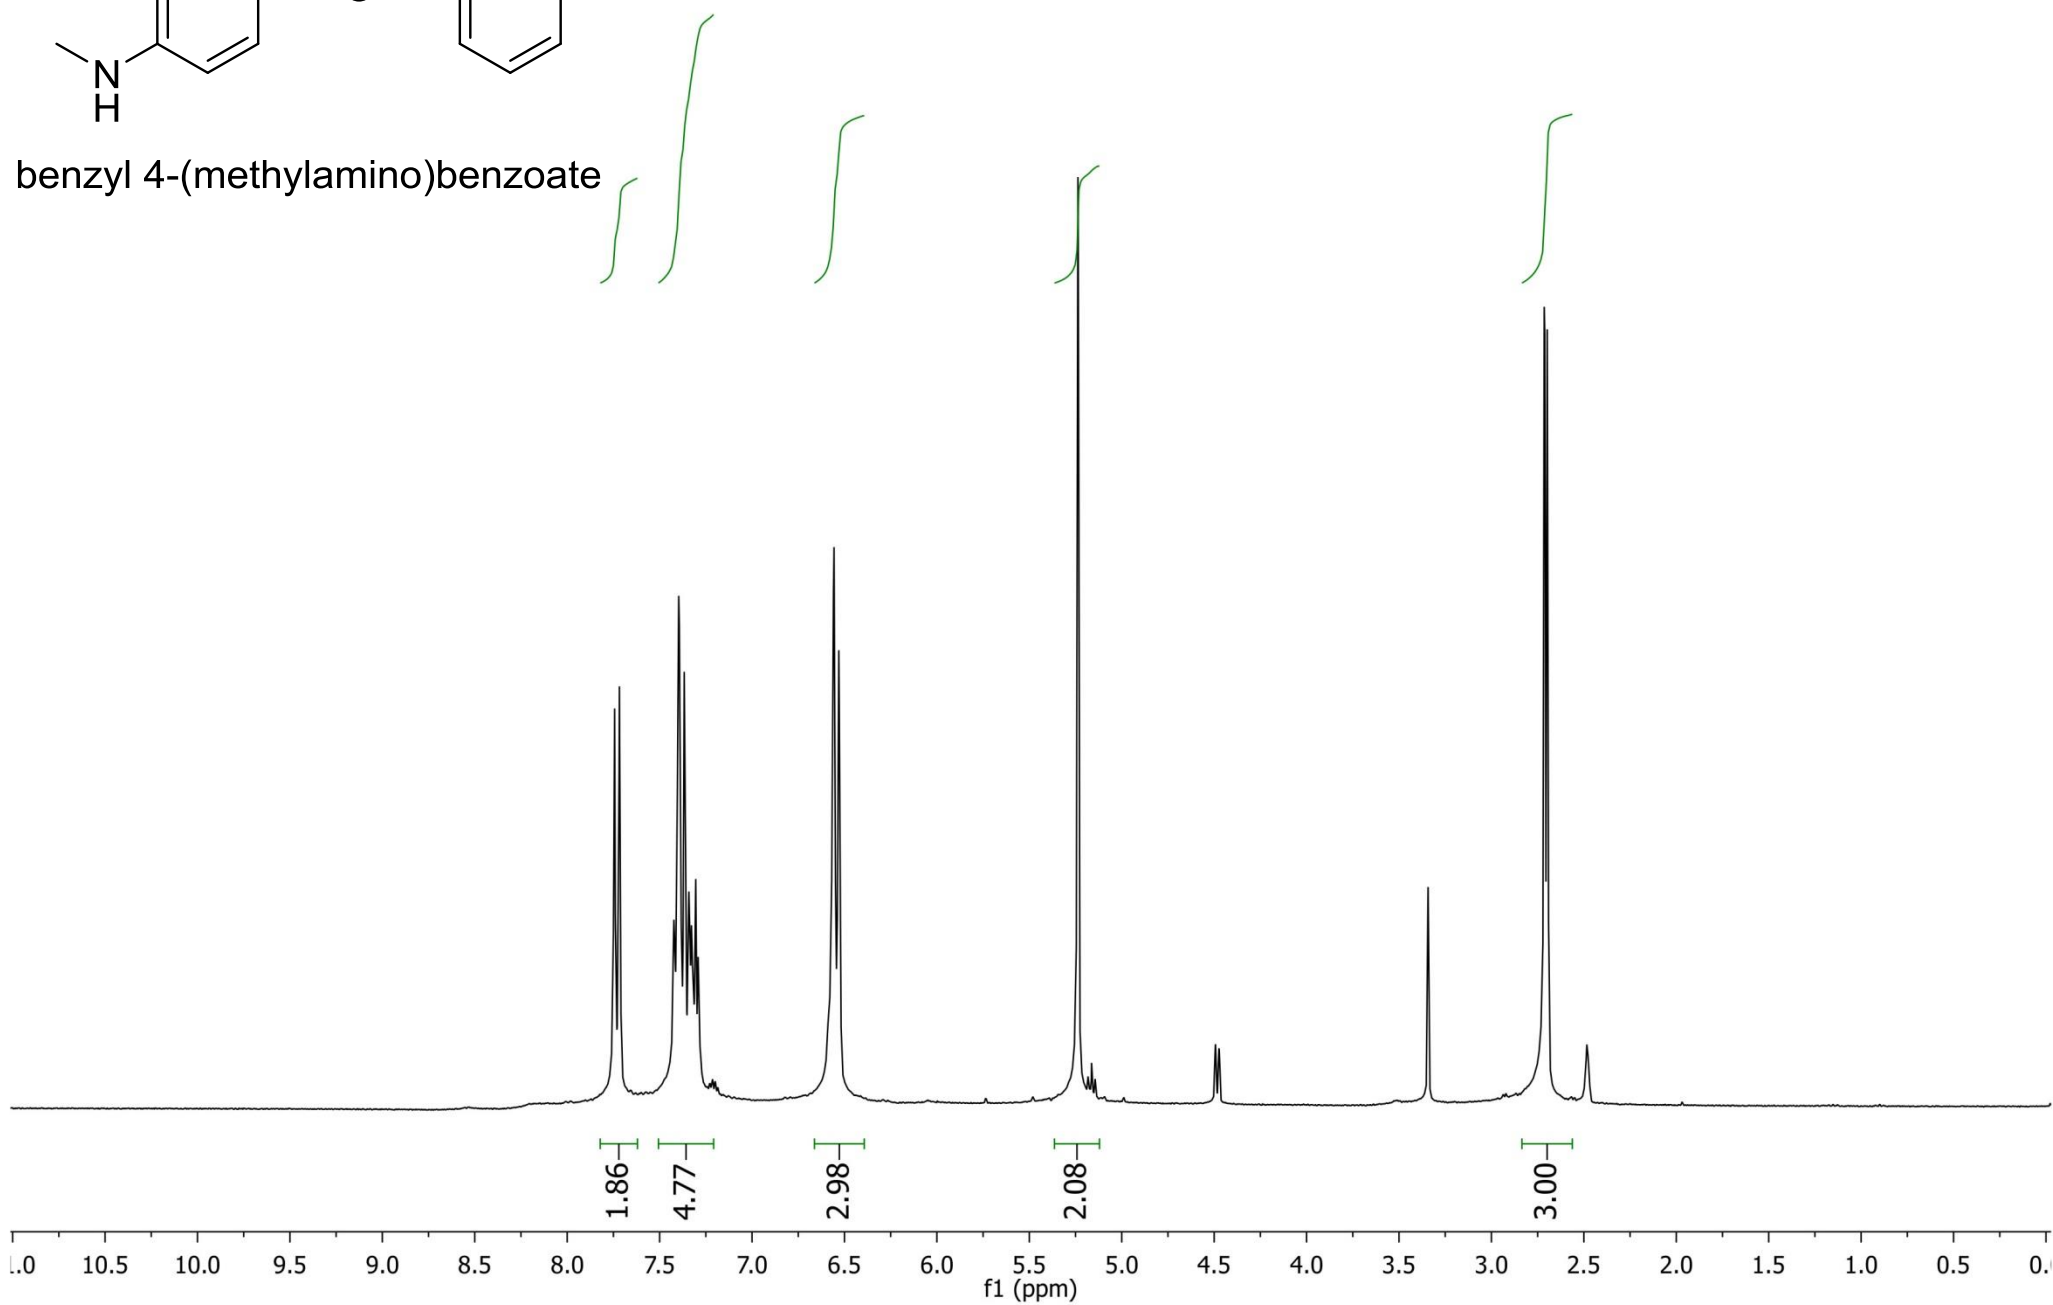

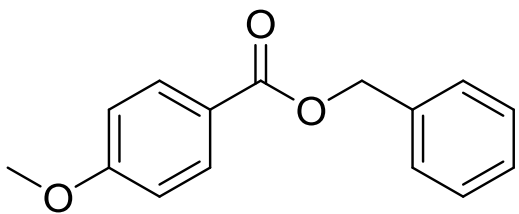

benzyl 4-methoxybenzoate

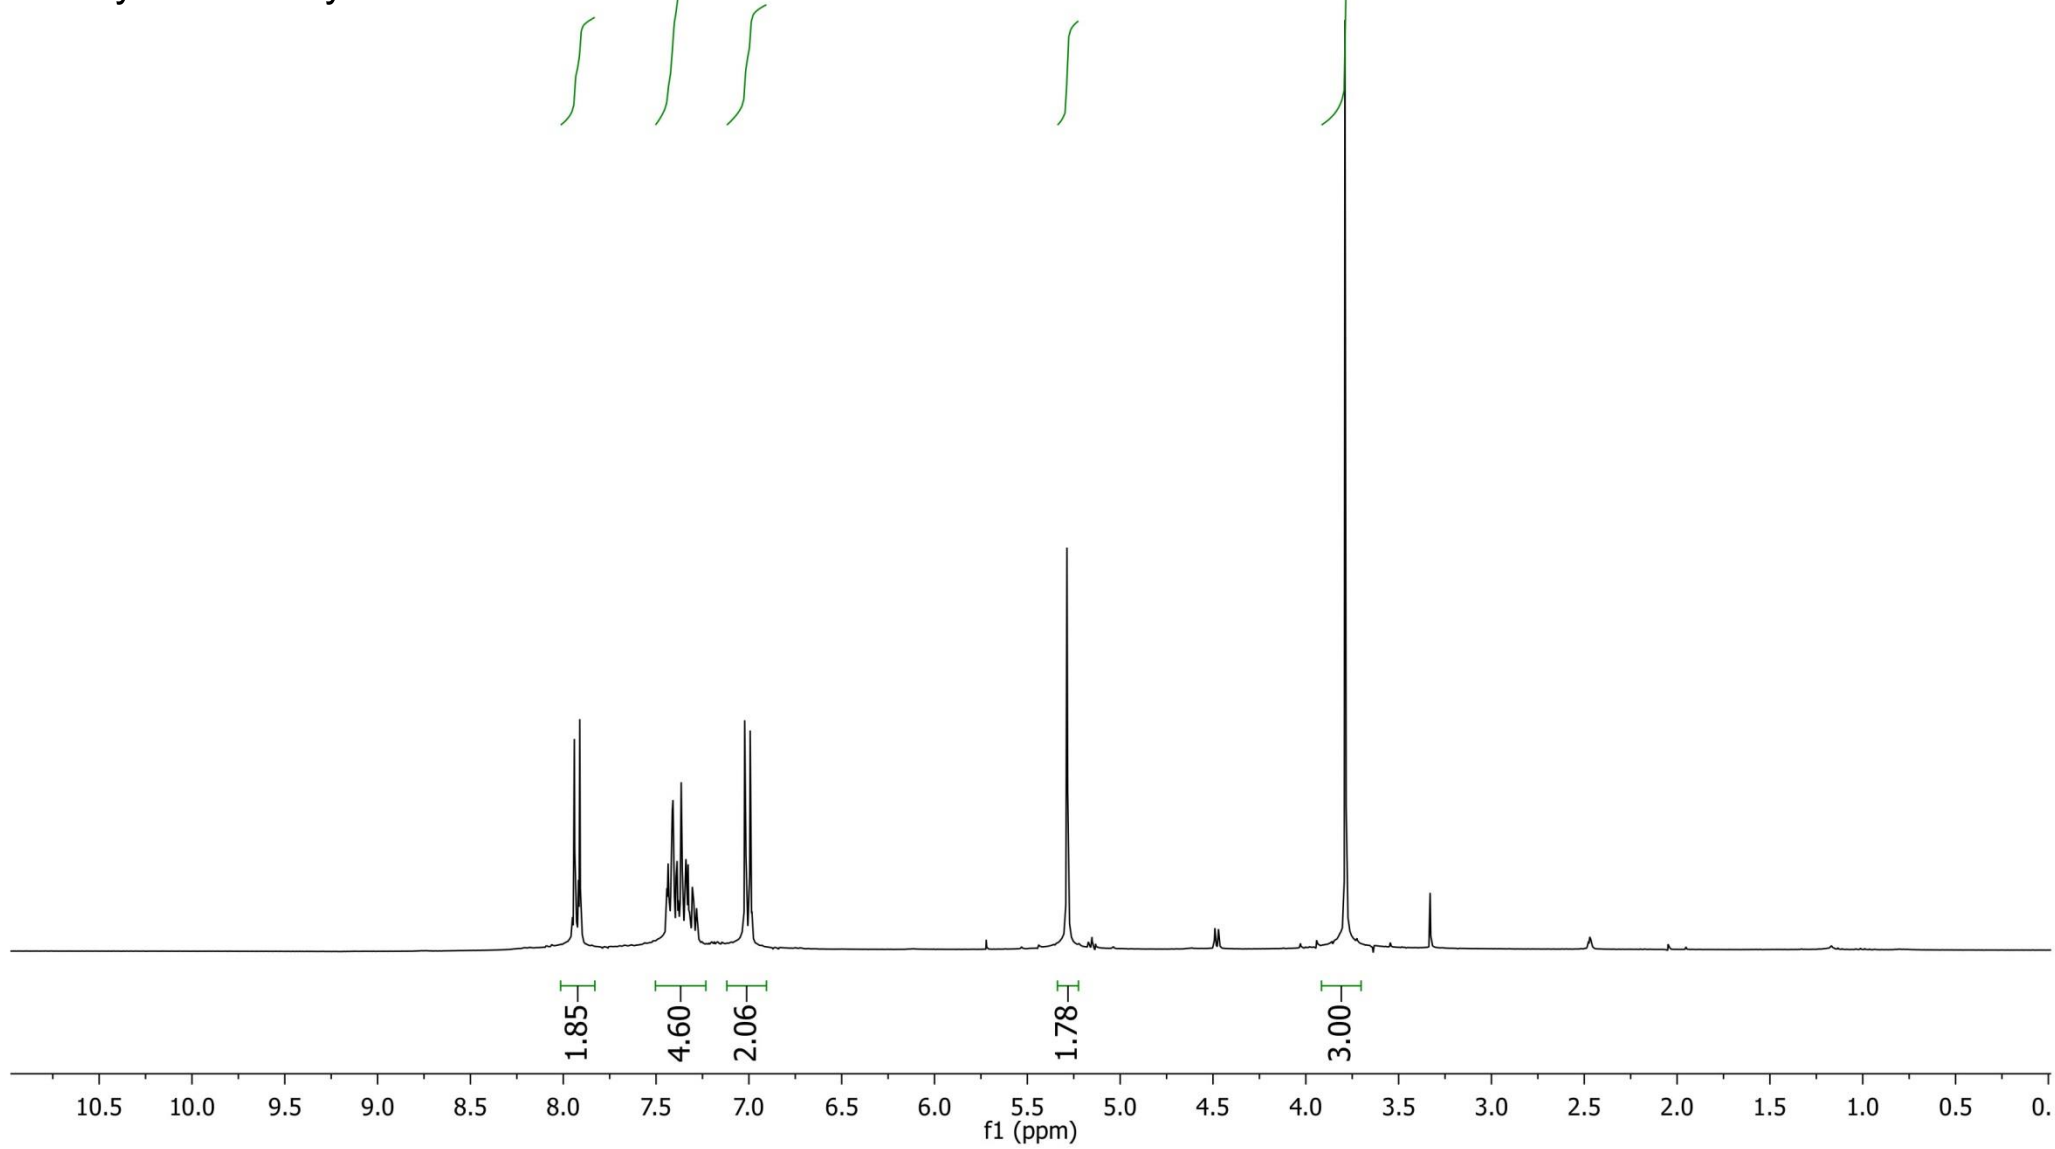

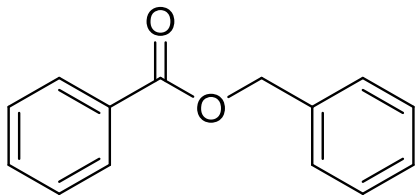

benzyl benzoate

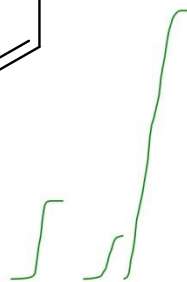

1.75  
0.98  
6.02

2.00

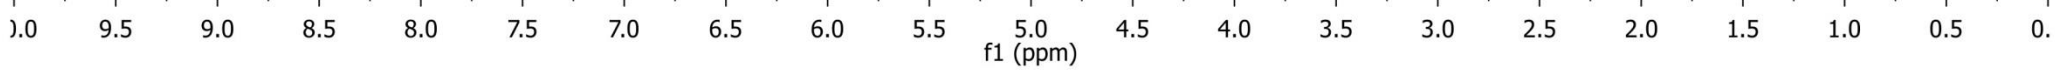

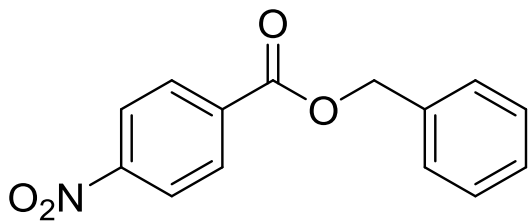

benzyl 4-nitrobenzoate

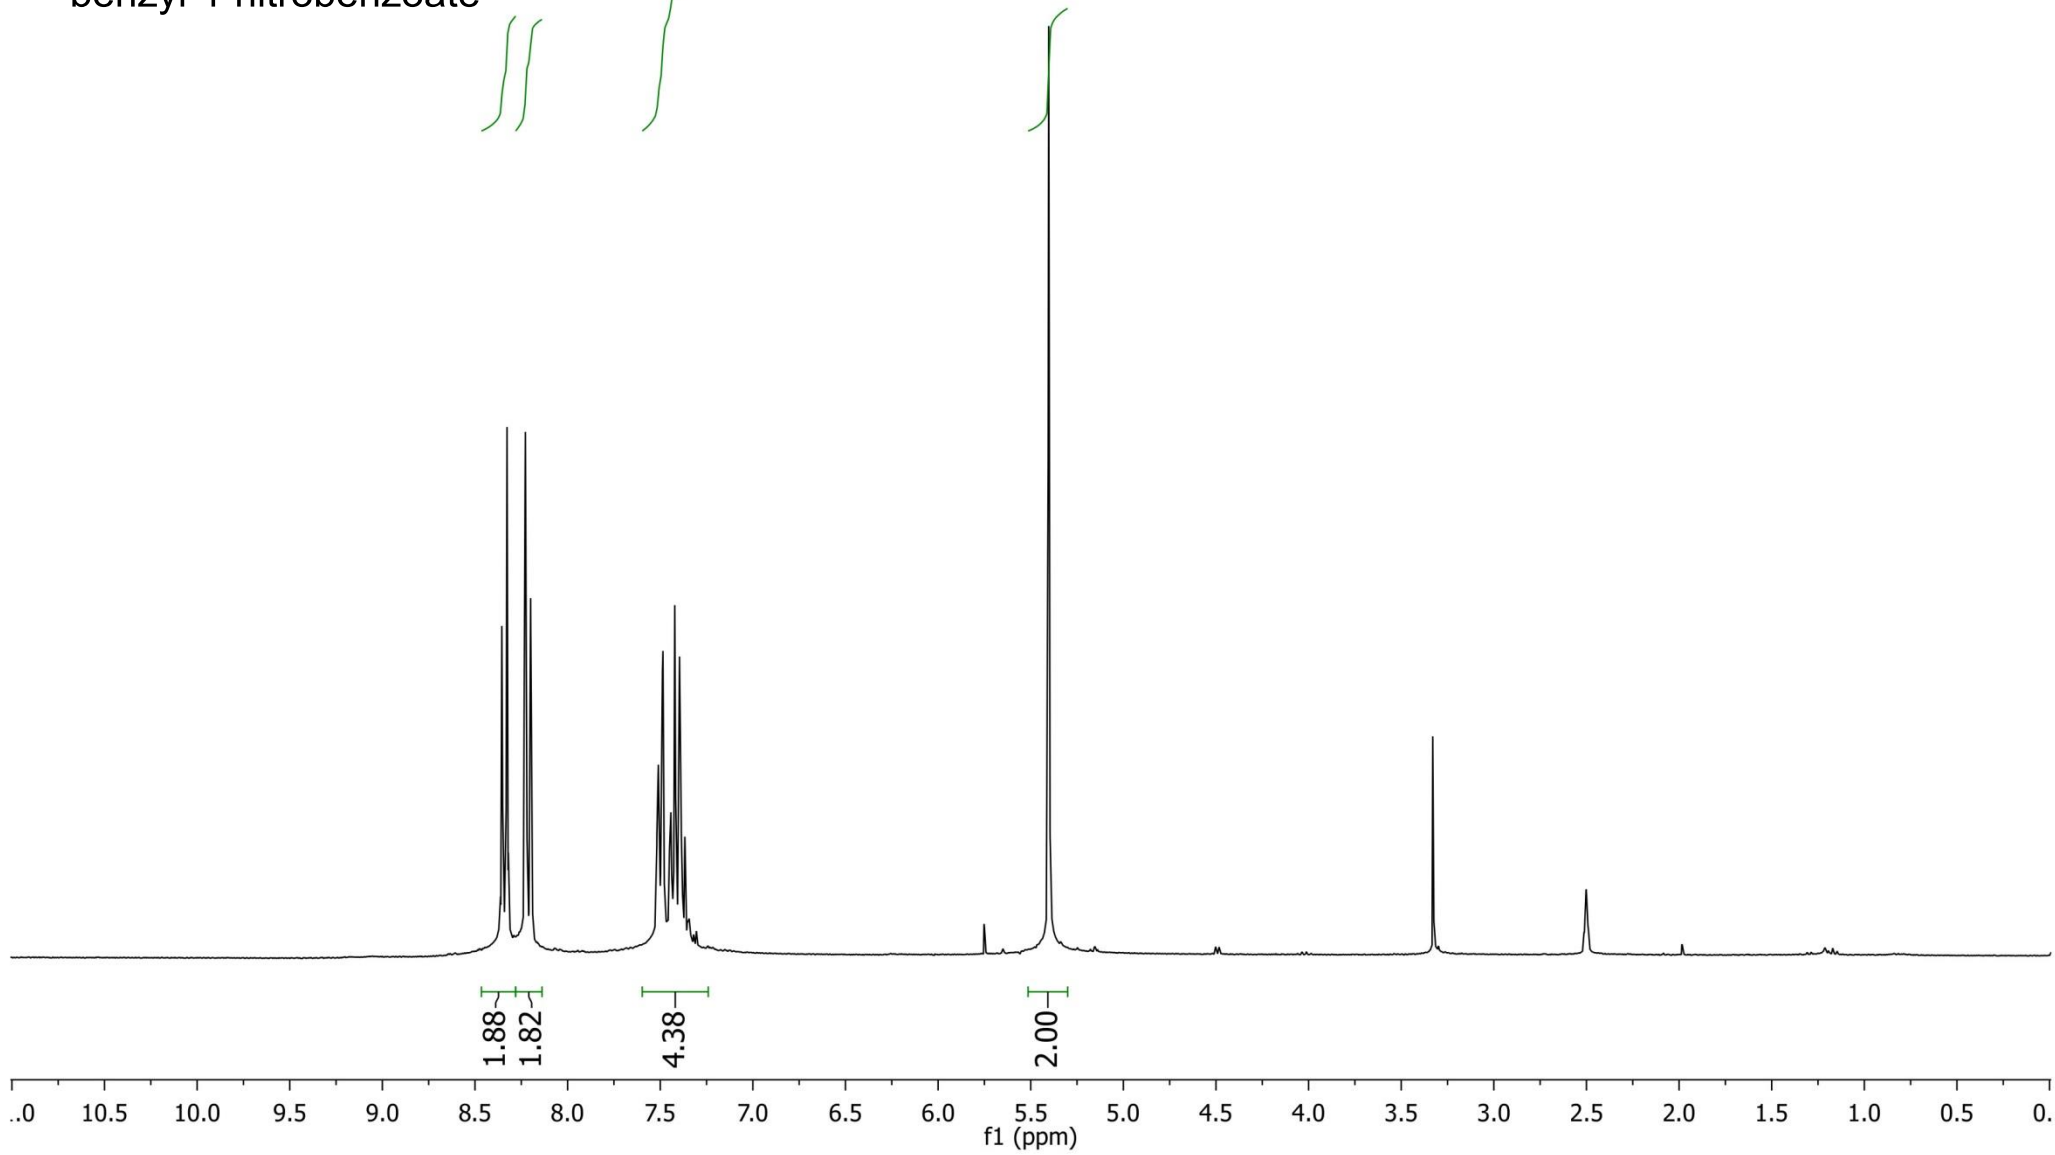

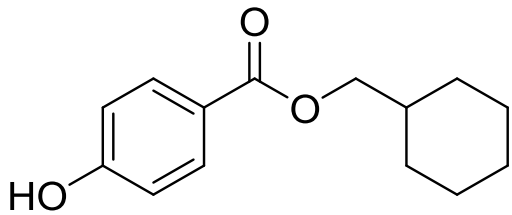

cyclohexylmethyl 4-hydroxybenzoate

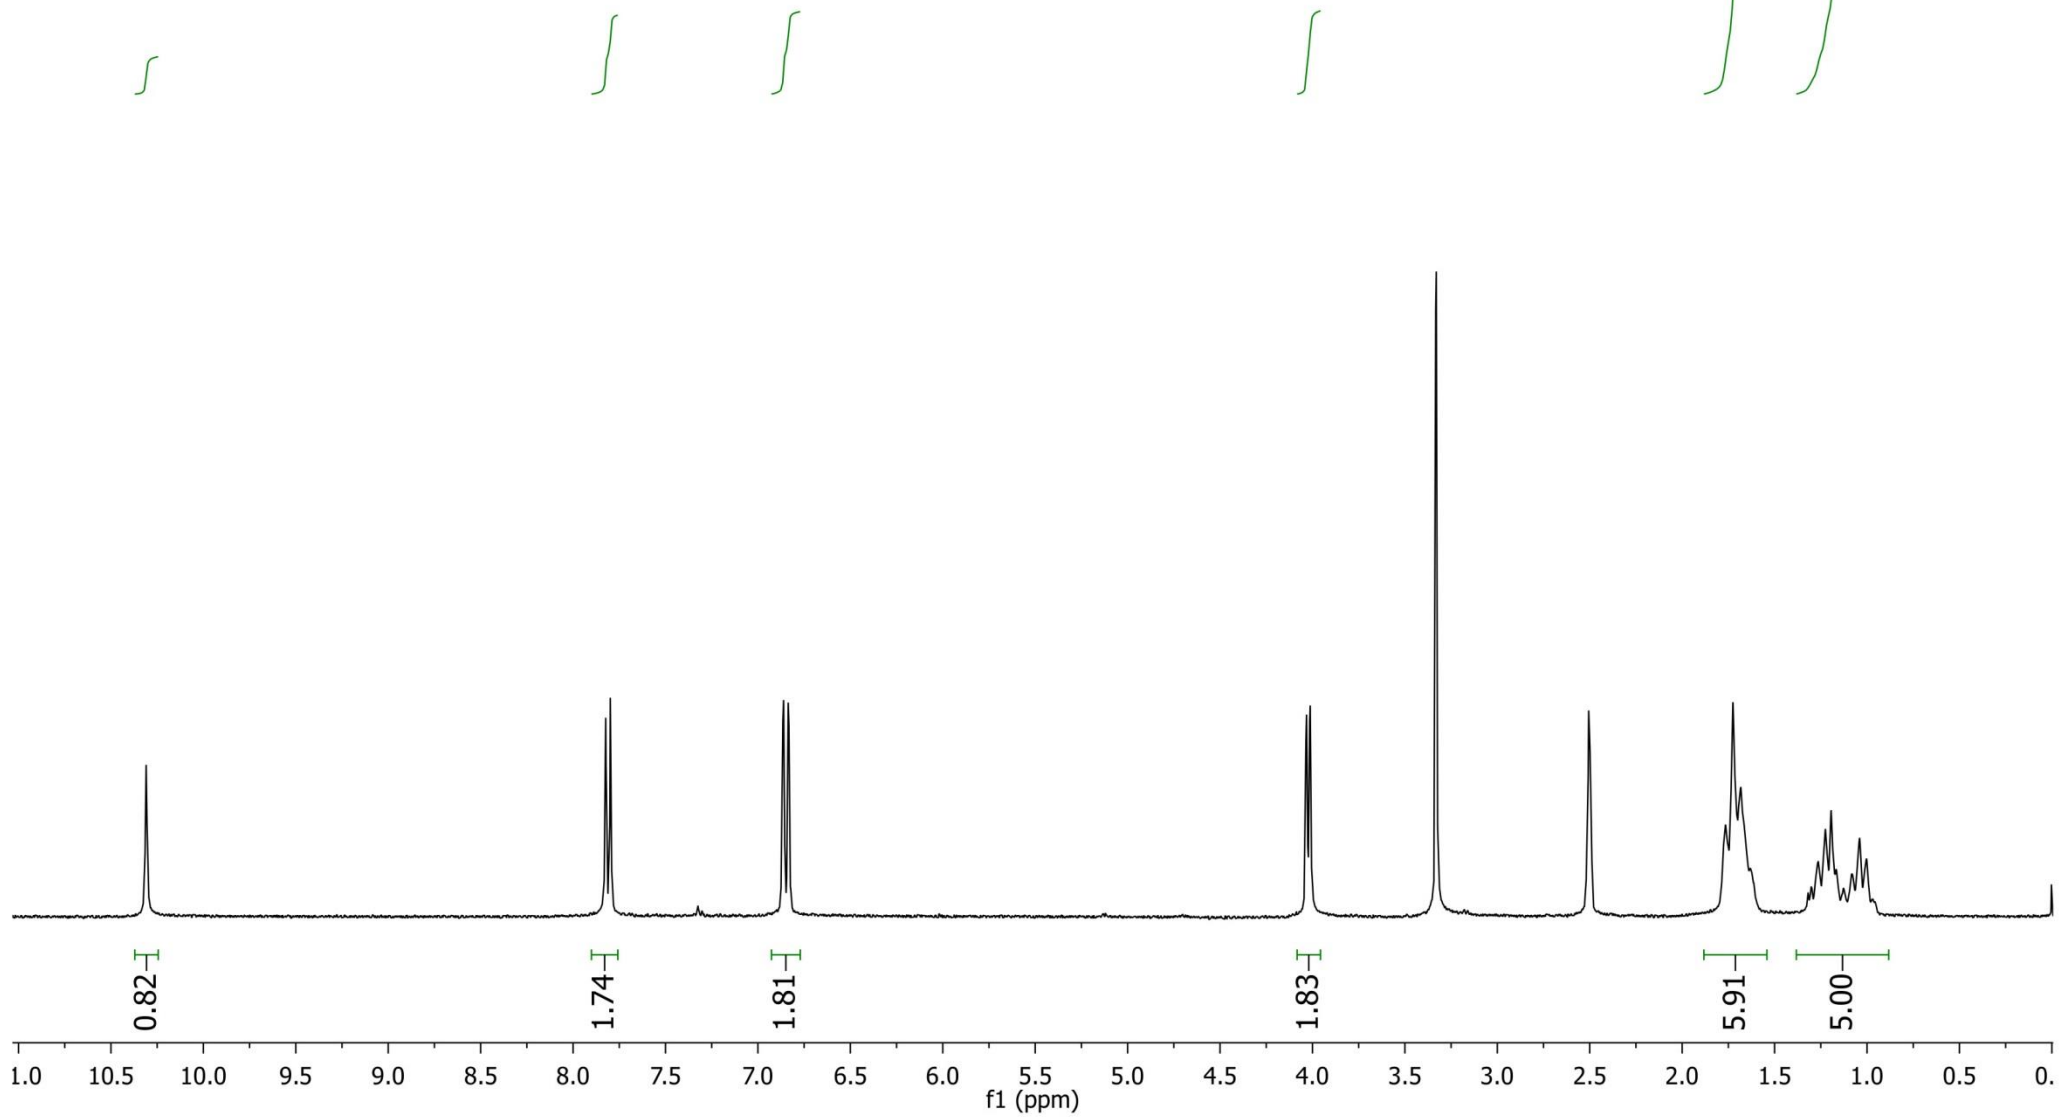

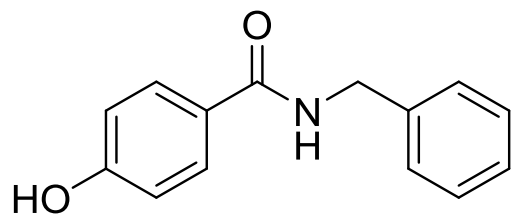

*N*-benzyl-4-hydroxybenzamide

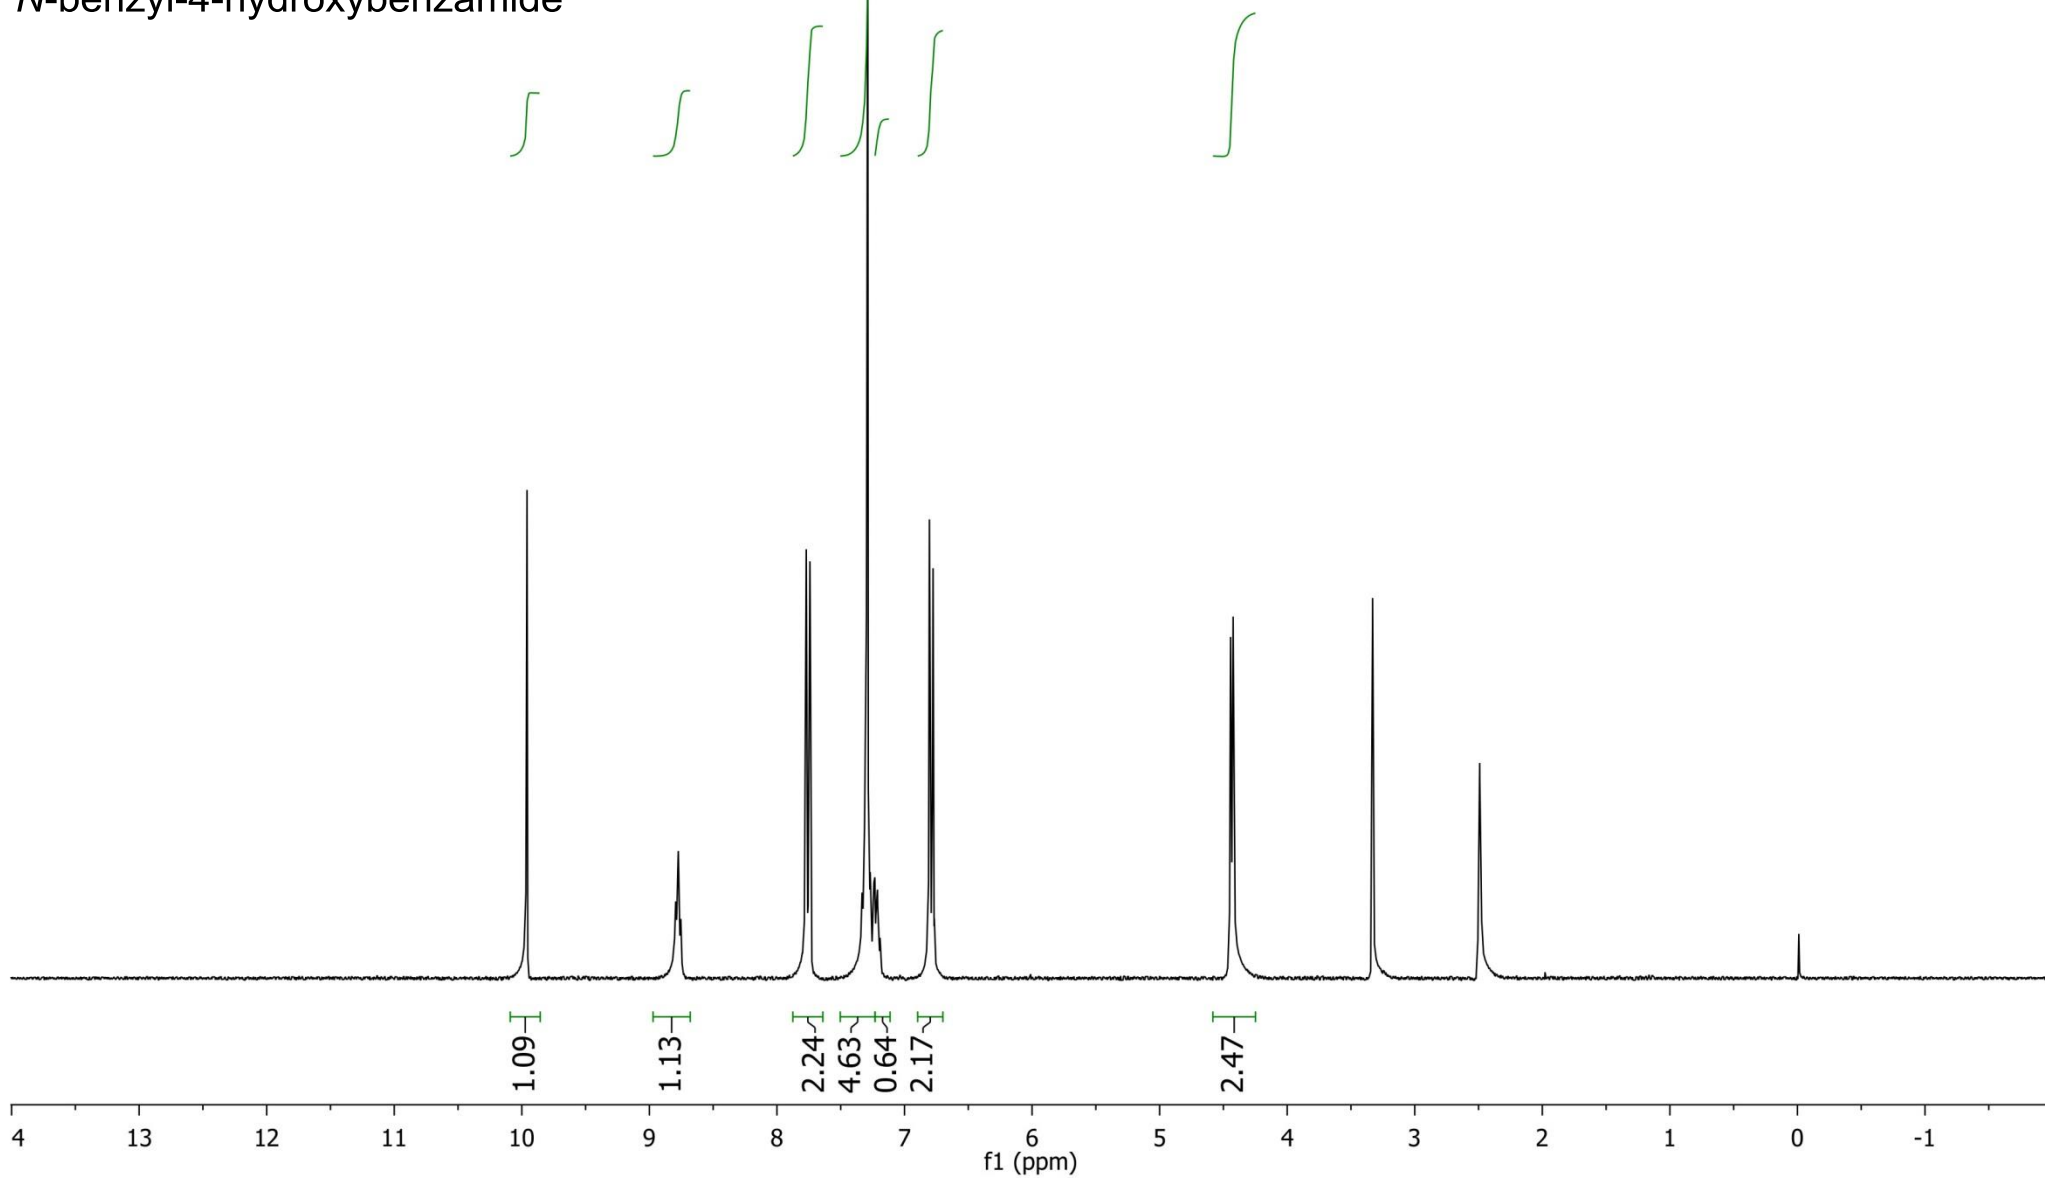

Supplement: NIHMS821933-supplement-1.pdf [file NIHMS821933-supplement-1.pdf]
